CORRECTION

# Correction: Selection of Orthologous Genes for Construction of a Highly Resolved Phylogenetic Tree and Clarification of the Phylogeny of Trichosporonales Species

The *PLOS ONE* Staff

The following information is missing from the Funding section: MT is also supported by the Grants-in-Aid for Scientific Research (Number 26650148) from the Japan Society for the Promotion of Science (JSPS).

The publisher apologizes for the error.

## Reference

1. Takashima M, Manabe R-i, Iwasaki W, Ohyama A, Ohkuma M, Sugita T (2015) Selection of Orthologous Genes for Construction of a Highly Resolved Phylogenetic Tree and Clarification of the Phylogeny of Trichosporonales Species. *PLoS ONE* 10(8): e0131217. doi:[10.1371/journal.pone.0131217](https://doi.org/10.1371/journal.pone.0131217) PMID: [26241762](https://pubmed.ncbi.nlm.nih.gov/26241762/)

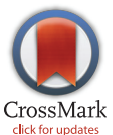

## OPEN ACCESS

**Citation:** The *PLOS ONE* Staff (2015) Correction: Selection of Orthologous Genes for Construction of a Highly Resolved Phylogenetic Tree and Clarification of the Phylogeny of Trichosporonales Species. *PLoS ONE* 10(9): e0138637. doi:[10.1371/journal.pone.0138637](https://doi.org/10.1371/journal.pone.0138637)

**Published:** September 15, 2015

**Copyright:** © 2015 The PLOS ONE Staff. This is an open access article distributed under the terms of the [Creative Commons Attribution License](https://creativecommons.org/licenses/by/4.0/), which permits unrestricted use, distribution, and reproduction in any medium, provided the original author and source are credited.
